# Supplementary material
Source: publisher site journal article supplement (https://www.dovepress.com/article/467142)
Supplement: Supplementary file 1 [file get_supplementary_file.php]

Supplemental Digital Content

SDC Figure 1. Study timeline

SDC Table 1. Aspects participants liked and disliked about the videos

| **Aspects participants liked about the videos** |
| --- |
| 3-Month Responses |
| Hearing from other patients /real people (x 4 respondents) |
| Comprehensive info |
| Information on the medication (x 3 respondents) |
| I like the part about how the cells attacked the kidney recognizing it being foreign and how the antivirus medication blocks that attack and protects the kidney; those videos help it to be more clear |
| The information was very informative, easy to understand, and short and to the point. |
| Level of information; could watch them more than once |
| I liked the cartoon characters. they were easy to understand and brought the points across well.. |
| Found it all informational (x 7 respondents) |
| Perspective from past recipients |
| Information |
| That it enforces the information that was given by the Transplant Teem at the Hospital and appointments |
| The actual recipient was seen and not just quoted. |
| They were straight forward and easy to understand |
| They were simplistic so we could understand them |
| Life after transplant |
| I enjoyed the personal testimonies that provided insight into some of the things kidney recipients could expect in their road to recovery. |
| Testimonials |
| Explained in simple easy to understand language |
| I used the videos to help educate my spouse as well. Also liked the use of the comics/animated characters rather than just having a real person talking into a camera. |
| I did find all videos very informative and easy to understand . The colors and all graphics done with good taste and creativity . The explanations of treatment , medicine , treatment after surgery and home recovery were good explained . |
| Educational and simple to understand |
| Stimulating |
| The past transplant patients |
| Definitely covered the basics |
| Comprehensive info |
| Details of the process and healing |
| 12-Month Responses |
| Informative and easy to understand. |
| There was relevant information in the videos. |
| The animation with the characters kept me interested |
| Informative (x 2 respondents) |
| Educational and informative |
| You can't overtake your medications. |
| Transplant medications and the life after transplant |
| Post transplant care & need for medications to sustain it. |
| I don't know that I would say I learned anything new in the videos; however, they were an excellent reminder of the issues I read and learned from the post-transplant booklet provided to me |
| That they existed, as video is a good format |
| The honesty of all the people interviewed. Really is genuine information |
| Information that i got on how to manage medicine and my health |
| information about medication and life after transplant |
| The live video interview |
| All / all of them/ everything (x 6 respondents) |
| i liked being able to learn what to expect was normal after transplant and how important taking your medications on time and every time was |
| All of them, as they are all very important informations |
| Easy to understand (x 2 respondents) |
| Information that i got on how to manage medicine and my health |
| better than reading the papers for information |
| Cartoon were quite informative |
| They were easy to understand. |
| Patient comments |
| They were very informative and personable. I was able to connect with the person detailing their experience. |
| I am a visual learner, so I liked it for that aspect |
| Clear message. |
| I liked the cartoon characters and having Dr.x featured in it made it more close-to-home. |
| The information about medication, importance of it use to tell you the truth all of them provided a information important to keep our selves and the transplanted kidney healthy as long as possible . |
| I found every information helpful and beneficial |
| Everything in the video was exactly what I was told by the pre-op and post-op teams. |
| Transplant medications and the life after transplant |
| Step by step with real people |
| it was pretty long ago I would have to watch it again (x 2) |

| **Aspects participants disliked about the videos** |
| --- |
| 3-Month Responses |
| None/nothing I disliked (x 18respondents) |
| Cartoon figures |
| So well put together. Nothing to dislike. |
| There was nothing I disliked. |
| All of value |
| Kinda slow |
| Things I already knew |
| Nothing really! They were all really done well! (x 2 respondents) |
| Some could have gone into a little more depth. It would be helpful to be able to download pdf files for future referral. |
| Just that I didn’t’ need them so I found them tedious, as I summed all of them up with: Kidney are expensive Take your medication Medication will make your expensive kidney last longer TAKE MEDICATION |
| Second one was a bit too long |
| Could have been less animation |
| Seemed a bit staid, explained a lot of why must take medications, not enough on how and “hacks” to make sure it’s easy to do remember to rake them |
| It’s been a while since I’ve watched them but I think they need to be more on the lighter side of explanation. |
| Should dwell more on hydration |
| Not many female was in the display of the videos. |
| I feel like some of the information provided was used as a scare tactic. As opposed to just providing the details and letting people make smart decisions |
| A little juvenile in the approach |
| Medical jargon and the assumption that we all started from the same basis of understanding or comprehension |
| I do not have any criticism regarding those videos. Thank you for making it and made available to look on in the future if I will need to look at them again. I do not have no one to remind me anything about if I would forget so definitely I will look at them again. |
| 12-Month Responses |
| None / nothing (x 16 respondents) |
| Nothing,....that I can remember. |
| They are generalized and not just for my situation. |
| I didn't dislike them at all |
| Not enough info |
| No. I didn't know anything about transplantion before |
| Nothing specifically /none really (2 respondents) |
| Some animation was cheesy. |
| A bit dry |
| Seems really dated and kinda boring- way people talk etc…Think information can be done in better form |
| One was too short |
| Should include more details about handling complications |
| Maybe a look into multiple kidney organ recipients would give a broader spectrum into the after care. |
| More information |
| Sometimes repetitive |
| Not available before transplant. It’d be nice to have a better handle on the changes coming with a transplant, before the transplant. |
| None that I can think of (x 3 respondents) |

*Includes all comments from everyone who answered the 3-month survey, 12-month survey, or both. Those who responded to both may be represented twice.*
